# Supplementary material for: Seroepidemiological Survey of West Nile Virus Infections in Horses from Berlin/Brandenburg and North Rhine-Westphalia, Germany
Source: Viruses. 2022 Jan 25;14(2):243. doi: 10.3390/v14020243 (PMC8877243; doi:10.3390/v14020243)
Supplement: Supplementary file 1 [file viruses-14-00243-s001.zip › Supplemental Tables 1-6_new_final.xlsx]

## Sheet: Tabelle1
Supplemental Table 1:		Detailed ELISA and different VNT results of each horse sample from panel A (BB/BE) from 2019
						positive VNT titers highlighted in bold and orange
		IgM-WNV-ELISA		IgG-WNV-ELISA		WNV-VNT	TBEV-VNT	USUV-VNT
	ID number	S/P%	result	S/N %	result	ND50	ND50	ND50
	P 2026	0.21247	negative	78.53	negative	n.t.	n.t.	n.t.
	P 2027	-0.4374	negative	79.79	negative	n.t.	n.t.	n.t.
	P 2028	194.722	positive	23.89	positive	120	< 10	< 10
	P 2029	-3.7068	negative	77.89	negative	n.t.	n.t.	n.t.
	P 2030	5.3808	negative	79.94	negative	n.t.	n.t.	n.t.
	P 2031	1.4827	negative	80.96	negative	n.t.	n.t.	n.t.
	P 2032	11.9574	negative	81.06	negative	n.t.	n.t.	n.t.
	P 2033	-12.947	negative	79.85	negative	n.t.	n.t.	n.t.
	P 2034	-13.7047	negative	83.27	negative	n.t.	n.t.	n.t.
	P 2035	-14.2459	negative	86.29	negative	n.t.	n.t.	n.t.
	P 2036	14.6597	negative	77.35	negative	n.t.	n.t.	n.t.
	P 2037	-11.142	negative	78.89	negative	n.t.	n.t.	n.t.
	P 2038	-13.9116	negative	78.85	negative	n.t.	n.t.	n.t.
	P 2039	-12.6223	negative	77.24	negative	n.t.	n.t.	n.t.
	P 2040	-10.5849	negative	78.7	negative	n.t.	n.t.	n.t.
	P 2041	-11.7309	negative	9.78	positive	< 10	< 10	15
	P 2042	-12.7497	negative	83.64	negative	n.t.	n.t.	n.t.
	P 2043	-11.6673	negative	72.64	negative	n.t.	n.t.	n.t.
	P 2044	138.734	positive	16.28	positive	80	< 10	10
	P 2045	-13.9912	negative	73.76	negative	n.t.	n.t.	n.t.
	P 2046	-14.9781	negative	75.25	negative	n.t.	n.t.	n.t.
	P 2047	-15.1054	negative	74.31	negative	n.t.	n.t.	n.t.
	P 2048	-9.8686	negative	21.95	positive	< 10	< 10	< 10
	P 2049	-16.522	negative	76.14	negative	n.t.	n.t.	n.t.
	P 2050	-15.8853	negative	86.07	negative	n.t.	n.t.	n.t.
	P 2051	-16.0127	negative	81.14	negative	n.t.	n.t.	n.t.
	P 2052	-12.9247	negative	72.57	negative	n.t.	n.t.	n.t.
	P 2053	-1.6399	negative	74.74	negative	n.t.	n.t.	n.t.
	P 2054	-2.2099	negative	5.17	positive	1920	< 10	40
	P 2055	-1.7474	negative	71.39	negative	n.t.	n.t.	n.t.
	P 2056	-0.6183	negative	76.95	negative	n.t.	n.t.	n.t.
	P 2057	0.2634	negative	60.86	negative	n.t.	n.t.	n.t.
	P 2058	-6.3393	negative	71.88	negative	n.t.	n.t.	n.t.
	P 2059	3.8875	negative	77.54	negative	n.t.	n.t.	n.t.
	P 2060	-3.9842	negative	75.15	negative	n.t.	n.t.	n.t.
	P 2061	-3.1239	negative	66.81	negative	n.t.	n.t.	n.t.
	P 2062	-2.4464	negative	77.5	negative	n.t.	n.t.	n.t.
	P 2063	-0.2849	negative	72.03	negative	n.t.	n.t.	n.t.
	P 2064	-4.081	negative	48.46	doubtful	< 10	< 10	< 10
	P 2065	-5.264	negative	69.52	negative	n.t.	n.t.	n.t.
	P 2066	-0.1881	negative	73.03	negative	n.t.	n.t.	n.t.
	P 2068	-2.7476	negative	66.3	negative	n.t.	n.t.	n.t.
	P 2069	0.8011	negative	66.82	negative	n.t.	n.t.	n.t.
	P 2070	7.5975	negative	53.67	negative	n.t.	n.t.	n.t.
	P 2071	-0.9194	negative	57.52	negative	n.t.	n.t.	n.t.
	P 2072	-2.3174	negative	56.65	negative	n.t.	n.t.	n.t.
	P 2073	8.888	negative	55.61	negative	n.t.	n.t.	n.t.
	P 2074	-3.7584	negative	54.57	negative	n.t.	n.t.	n.t.
	P 2075	-0.9302	negative	49.51	doubtful	< 10	< 10	< 10
	P 2076	5.1457	negative	30.5	positive	< 10	< 10	< 10
	P 2077	-1.3173	negative	53.96	negative	n.t.	n.t.	n.t.
	P 2078	-1.8335	negative	53.18	negative	n.t.	n.t.	n.t.
	P 2079	-0.73663	negative	91.03	negative	n.t.	n.t.	n.t.
	P 2080	-0.1451	negative	10.14	positive	480	< 10	40
	P 2081	-2.597	negative	87.14	negative	n.t.	n.t.	n.t.
	P 2082	-2.511	negative	91.19	negative	n.t.	n.t.	n.t.
	P 2083	-0.0914	negative	97.19	negative	n.t.	n.t.	n.t.
	P 2084	-1.0269	negative	87.83	negative	n.t.	n.t.	n.t.
	P 2085	-0.6613	negative	85.34	negative	n.t.	n.t.	n.t.
	P 2086	-0.0268	negative	84.37	negative	n.t.	n.t.	n.t.
	P 2087	-1.113	negative	90.08	negative	n.t.	n.t.	n.t.
	P 2088	-0.2204	negative	88.92	negative	n.t.	n.t.	n.t.
	P 2089	6.0382	negative	90.58	negative	n.t.	n.t.	n.t.
	P 2090	-1.5754	negative	54.86	negative	n.t.	n.t.	n.t.
	P 2091	-3.1239	negative	107.63	negative	n.t.	n.t.	n.t.
	P 2092	-0.4032	negative	90.22	negative	n.t.	n.t.	n.t.
	P 2093	-5.5651	negative	85.85	negative	n.t.	n.t.	n.t.
	P 2094	-3.5003	negative	77.91	negative	n.t.	n.t.	n.t.
	P 2095	-2.7261	negative	90.27	negative	n.t.	n.t.	n.t.
	P 2096	6.049	negative	83.27	negative	n.t.	n.t.	n.t.
	P 2097	-1.2966	negative	80.22	negative	n.t.	n.t.	n.t.
	P 2098	-3.4073	negative	78.03	negative	n.t.	n.t.	n.t.
	P 2099	-0.5729	negative	87.39	negative	n.t.	n.t.	n.t.
	P 2100	-5.8932	negative	87.58	negative	n.t.	n.t.	n.t.
	P 2101	-7.0661	negative	82.13	negative	n.t.	n.t.	n.t.
	P 2102	-7.7396	negative	85.21	negative	n.t.	n.t.	n.t.
	P 2103	-9.1215	negative	77.3	negative	n.t.	n.t.	n.t.
	P 2104	-12.0013	negative	98.96	negative	n.t.	n.t.	n.t.
	P 2105	-6.021	negative	10.19	positive	480	< 10	15
	P 2106	-9.8995	negative	16.55	positive	< 10	320	< 10
	P 2107	-7.2054	negative	88.78	negative	n.t.	n.t.	n.t.
	P 2108	-5.1268	negative	9.58	positive	40	< 10	< 10
	P 2109	-5.1268	negative	87.9	negative	n.t.	n.t.	n.t.
	P 2110	-9.0286	negative	88.46	negative	n.t.	n.t.	n.t.
	P 2111	-6.95	negative	85.56	negative	n.t.	n.t.	n.t.
	P 2112	-5.3126	negative	98.73	negative	n.t.	n.t.	n.t.
	P 2113	-4.4997	negative	10.72	positive	80	< 10	15
	P 2114	-4.8713	negative	12.32	positive	10	< 10	< 10
	P 2115	-1.1554	negative	87.69	negative	n.t.	n.t.	n.t.
	P 2117	-6.8338	negative	80.66	negative	n.t.	n.t.	n.t.
	P 2118	-8.6338	negative	75.53	negative	n.t.	n.t.	n.t.
	P 2119	-6.9964	negative	85.84	negative	n.t.	n.t.	n.t.
	P 2120	-8.088	negative	93.15	negative	n.t.	n.t.	n.t.
	P 2121	-7.4261	negative	96.01	negative	n.t.	n.t.	n.t.
	P 2122	-6.9616	negative	83.86	negative	n.t.	n.t.	n.t.
	P 2123	-7.5886	negative	77.87	negative	n.t.	n.t.	n.t.
	P 2124	-9.435	negative	84.01	negative	n.t.	n.t.	n.t.
	P 2125	-8.448	negative	82.29	negative	n.t.	n.t.	n.t.
						n.t. = not tested

## Sheet: Tabelle2
Supplemental Table 2:		Detailed ELISA and different VNT results of each horse sample from panel A (BB/BE) from 2020
						positive VNT titers highlighted in bold and orange
		IgM-WNV-ELISA		IgG-WNV-ELISA		WNV-VNT	TBEV-VNT	USUV-VNT
	ID number	S/P%	result	S/N %	result	ND50	ND50	ND50
	P 2131	-9.08	negative	100.091	negative	n.t.	n.t.	n.t.
	P 2132	-13.79	negative	88.6699	negative	n.t.	n.t.	n.t.
	P 2133	-13.89	negative	90.9144	negative	n.t.	n.t.	n.t.
	P 2134	-13.52	negative	81.9612	negative	n.t.	n.t.	n.t.
	P 2135	-12.22	negative	89.349	negative	n.t.	n.t.	n.t.
	P 2136	-11.83	negative	92.488	negative	n.t.	n.t.	n.t.
	P 2137	-7.15	negative	102.741	negative	n.t.	n.t.	n.t.
	P 2138	-15.48	negative	16.1587	positive	20	< 10	< 10
	P 2139	-16.52	negative	15.5458	positive	30	< 10	< 10
	P 2140	-13.01	negative	95.7015	negative	n.t.	n.t.	n.t.
	P 2141	-11.16	negative	97.6313	negative	n.t.	n.t.	n.t.
	P 2142	-13.79	negative	93.1009	negative	n.t.	n.t.	n.t.
	P 2143	-8.99	negative	9.02766	positive	80	< 10	20
	P 2144	-10.96	negative	102.833	negative	n.t.	n.t.	n.t.
	P 2145	-13.82	negative	88.6285	negative	n.t.	n.t.	n.t.
	P 2146	-11.66	negative	58.5639	negative	n.t.	n.t.	n.t.
	P 2147*	-13.4	negative	89.8045	negative	n.t.	n.t.	n.t.
	P 2148	-12.1	negative	90.5334	negative	n.t.	n.t.	n.t.
	P 2149	-15.55	negative	84.6778	negative	n.t.	n.t.	n.t.
	P 2150	-11.3	negative	8.32367	positive	60	< 10	10
	P 2151	-6.96	negative	93.896	negative	n.t.	n.t.	n.t.
	P 2153	-12.25	negative	95.0969	negative	n.t.	n.t.	n.t.
	P 2154	-6.65	negative	81.0088	negative	n.t.	n.t.	n.t.
	P 2155	-8.97	negative	98.9399	negative	n.t.	n.t.	n.t.
	P 2157	-6.26	negative	9.83932	positive	120	< 10	10
	P 2158	-19.16	negative	86.6573	negative	n.t.	n.t.	n.t.
	P 2159	-2.21	negative	75.9235	negative	n.t.	n.t.	n.t.
	P 2161	-10.21	negative	91.784	negative	n.t.	n.t.	n.t.
	P 2162	-11.49	negative	88.1232	negative	n.t.	n.t.	n.t.
	P 2164	-13.2	negative	76.2879	negative	n.t.	n.t.	n.t.
	P 2166	-13.11	negative	74.0103	negative	n.t.	n.t.	n.t.
	P 2167 a	252.56	positive	31.8619	positive	640	< 10	< 10
	P 2168	175.02	positive	23.7287	positive	240	< 10	< 10
	P 2169	-13.15	negative	93.4819	negative	n.t.	n.t.	n.t.
	P 2170	-9.21	negative	91.5687	negative	n.t.	n.t.	n.t.
	P 2171	-17.28	negative	85.9284	negative	n.t.	n.t.	n.t.
	P 2172	-11.84	negative	84.1478	negative	n.t.	n.t.	n.t.
	P 2173	-6.07	negative	93.1174	negative	n.t.	n.t.	n.t.
	P 2174	-10.2	negative	92.4217	negative	n.t.	n.t.	n.t.
	P 2175	-12.68	negative	95.1673	negative	n.t.	n.t.	n.t.
	P 2176	-11.21	negative	7.87103	positive	10	< 10	< 10
	P 2177	-0.28	negative	57.628	negative	n.t.	n.t.	n.t.
	P 2178	-9.94	negative	79.5039	negative	n.t.	n.t.	n.t.
	P 2179	-14.89	negative	90.5991	negative	n.t.	n.t.	n.t.
	P 2180	-12.36	negative	81.6128	negative	n.t.	n.t.	n.t.
	P 2181	-10.58	negative	78.8176	negative	n.t.	n.t.	n.t.
	P 2182	-12.25	negative	81.0695	negative	n.t.	n.t.	n.t.
	P 2183	-8.951	negative	6.84873	positive	480	< 10	10
	P 2186	-18.79	negative	7.67801	positive	60	< 10	< 10
	P 2188	-19.52	negative	83.636	negative	n.t.	n.t.	n.t.
	P 2190	-15.061	negative	78.5388	negative	n.t.	n.t.	n.t.
	P 2191	-12.59	negative	88.8619	negative	n.t.	n.t.	n.t.
	P 2192	-10.42	negative	88.676	negative	n.t.	n.t.	n.t.
	P 2193	-11.92	negative	80.4976	negative	n.t.	n.t.	n.t.
	P 2194	-9.42	negative	94.5525	negative	n.t.	n.t.	n.t.
	P 2195	-8.02	negative	85.7878	negative	n.t.	n.t.	n.t.
	P 2196	-11.84	negative	14.6626	positive	20	< 10	< 10
	P 2197	143.98	positive	15.6777	positive	120	< 10	< 10
	P 2198	-9.11	negative	7.79239	positive	320	< 10	15
	P 2200	-12.28	negative	84.7941	negative	n.t.	n.t.	n.t.
	P 2201	-11.72	negative	93.3586	negative	n.t.	n.t.	n.t.
	P 2202	-11.24	negative	32.4492	positive	< 10	< 10	< 10
	P 2203	-7.73	negative	71.8258	negative	n.t.	n.t.	n.t.
	P 2204	-13.93	negative	70.7678	negative	n.t.	n.t.	n.t.
	P 2205	-7.4	negative	78.4959	negative	n.t.	n.t.	n.t.
	P 2206	2.59	negative	70.4318	negative	n.t.	n.t.	n.t.
	P 2208	4.54	negative	71.7472	negative	n.t.	n.t.	n.t.
	P 2209	2.044	negative	94.5024	negative	n.t.	n.t.	n.t.
	P 2210	6.72	negative	131.369	negative	n.t.	n.t.	n.t.
	P 2212	-4.875	negative	190.978	negative	n.t.	n.t.	n.t.
	P 2213	-13.61	negative	25.6228	positive	70	< 10	< 10
	P 2214	-9.68	negative	69.0766	negative	n.t.	n.t.	n.t.
	P 2216	-8.177	negative	50.39	negative	< 10	< 10	< 10
	P 2217	-7.611	negative	104.749	negative	n.t.	n.t.	n.t.
	P 2218	-3.64	negative	114.216	negative	n.t.	n.t.	n.t.
	P 2221	210.3	positive	34.11	positive	60	< 10	< 10
	P 2222	-3.265	negative	75.2783	negative	n.t.	n.t.	n.t.
	P 2223	-8.89	negative	64.6772	negative	n.t.	n.t.	n.t.
	P 2227	-10.08	negative	44.95	doubtful	< 10	< 10	< 10
	P 2229	-9.553	negative	20.7463	positive	60	< 10	< 10
	P 2230	-3.243	negative	83.59	negative	n.t.	n.t.	n.t.
	P 2231	-4.92	negative	69.8187	negative	n.t.	n.t.	n.t.
	P 2232	-0.728	negative	76.4868	negative	n.t.	n.t.	n.t.
	P 2234	-9.244	negative	97.0423	negative	n.t.	n.t.	n.t.
	P 2235	-4.92	negative	112.796	negative	n.t.	n.t.	n.t.
	P 2236	-10.281	negative	144.525	negative	n.t.	n.t.	n.t.
	P 2237	-13.083	negative	106.753	negative	n.t.	n.t.	n.t.
	P 2241	-15.311	negative	81.8191	negative	n.t.	n.t.	n.t.
	P 2244	54.08	positive	167.465	negative	< 10	< 10	< 10
	P 2245	-17.14	negative	148.267	negative	n.t.	n.t.	n.t.
	P 2246	-7.302	negative	68.3558	negative	n.t.	n.t.	n.t.
	P 2247	-10.126	negative	22.1563	positive	< 10	30	< 10
	P 2250	-5.965	negative	108.64	negative	n.t.	n.t.	n.t.
	P 2251	-7.46	negative	119.665	negative	n.t.	n.t.	n.t.
	P 2252	-9.155	negative	133.065	negative	n.t.	n.t.	n.t.
	P 2253	-5.137	negative	120.683	negative	n.t.	n.t.	n.t.
	P 2254	-4.99	negative	101.809	negative	n.t.	n.t.	n.t.
	P 2256	-5.11	negative	98.7451	negative	n.t.	n.t.	n.t.
	P 2258	47.75	positive	14.52	positive	960	< 10	< 10
	P 2259	-5.5075	negative	93.5561	negative	n.t.	n.t.	n.t.
	P 2260	-1.91	negative	97.8212	negative	n.t.	n.t.	n.t.
	P 2261	-5.137	negative	101.809	negative	n.t.	n.t.	n.t.
	P 2262	-11.11	negative	104.889	negative	n.t.	n.t.	n.t.
	P 2263	-3.12	negative	25.3907	positive	10	< 10	< 10
	P 2264	-4.78	negative	15.0281	positive	640	< 10	30
	P 2265	-7.816	negative	90.0762	negative	n.t.	n.t.	n.t.
	P 2266	-3.05	negative	107.599	negative	n.t.	n.t.	n.t.
	P 2267	-0.3	negative	16.5217	positive	30	< 10	< 10
	P 2268*	-2	negative	108.122	negative	n.t.	n.t.	n.t.
	P 2269	-8.69	negative	103.411	negative	n.t.	n.t.	n.t.
	P 2270	-1.5	negative	82.9317	negative	n.t.	n.t.	n.t.
	P 2271	-3.63	negative	89.5219	negative	n.t.	n.t.	n.t.
	P 2272	-9.191	negative	111.818	negative	n.t.	n.t.	n.t.
	P 2273	-3.498	negative	19.7244	positive	20	< 10	< 10
	P 2274	-7.587	negative	107.014	negative	n.t.	n.t.	n.t.
	P 2276	-9.191	negative	80.9916	negative	n.t.	n.t.	n.t.
	P 2277	-11.42	negative	103.072	negative	n.t.	n.t.	n.t.
	P 2278	-6.018	negative	83.3936	negative	n.t.	n.t.	n.t.
	P 2279	-1.083	negative	111.34	negative	n.t.	n.t.	n.t.
	P 2280	-11.253	negative	114.297	negative	n.t.	n.t.	n.t.
	P 2281	-11.2345	negative	115.159	negative	n.t.	n.t.	n.t.
	P 2284	-7.234	negative	92.6784	negative	n.t.	n.t.	n.t.
	P 2285	14.49	negative	84.4407	negative	n.t.	n.t.	n.t.
	P 2286	-10.97	negative	100.008	negative	n.t.	n.t.	n.t.
	P 2288	-4.573	negative	114.481	negative	n.t.	n.t.	n.t.
	P 2289	-6.2477	negative	78.9591	negative	n.t.	n.t.	n.t.
	P 2290	-2.91	negative	103.248	negative	n.t.	n.t.	n.t.
	P 2291	-7.534	negative	110.127	negative	n.t.	n.t.	n.t.
	P 2292	-3.68	negative	91.6271	negative	n.t.	n.t.	n.t.
	P 2373	-11.265	negative	95.4952	negative	n.t.	n.t.	n.t.
	P 2374	-7.231	negative	88.8051	negative	n.t.	n.t.	n.t.
	P 2375	-0.608	negative	79.6412	negative	n.t.	n.t.	n.t.
	P 2376	-7.17	negative	84.9544	negative	n.t.	n.t.	n.t.
	P 2377	-13.07	negative	69.9974	negative	n.t.	n.t.	n.t.
	P 2379	-11	negative	82.9491	negative	n.t.	n.t.	n.t.
	P 2380	-9.39	negative	99.4544	negative	n.t.	n.t.	n.t.
	P 2381	-10.91	negative	104.528	negative	n.t.	n.t.	n.t.
	P 2382	-8.61	negative	98.3403	negative	n.t.	n.t.	n.t.
	P 2383	-5.815	negative	79.1099	negative	n.t.	n.t.	n.t.
	P 2384	-7.383	negative	102.574	negative	n.t.	n.t.	n.t.
	P 2385	-8.54	negative	100.329	negative	n.t.	n.t.	n.t.
	P 2386	-5.55	negative	99.2144	negative	n.t.	n.t.	n.t.
	P 2387	-8.64	negative	100.557	negative	n.t.	n.t.	n.t.
	P 2388	-8.95	negative	103.374	negative	n.t.	n.t.	n.t.
	P 2389	-8.19	negative	103.414	negative	n.t.	n.t.	n.t.
	P 2390	-10.07	negative	7.92413	positive	60	< 10	< 10
	P 2391	-1.41	negative	98.1575	negative	n.t.	n.t.	n.t.
	P 2392	-9.21	negative	99.6144	negative	n.t.	n.t.	n.t.
	P 2394	-6.62	negative	84.7488	negative	n.t.	n.t.	n.t.
	P 2396	-11.49	negative	104.053	negative	n.t.	n.t.	n.t.
	P 2397	-6.47	negative	90.1991	negative	n.t.	n.t.	n.t.
	P 2399	-9.69	negative	83.8804	negative	n.t.	n.t.	n.t.
	P 2400	-5.72	negative	87.3882	negative	n.t.	n.t.	n.t.
	P 2401	-6.71	negative	89.0793	negative	n.t.	n.t.	n.t.
	P 2403	-5.06	negative	82.3378	negative	n.t.	n.t.	n.t.
	P 2404	-6.73	negative	93.667	negative	n.t.	n.t.	n.t.
	P 2405	-8.566	negative	94.4097	negative	n.t.	n.t.	n.t.
	P 2406	-8.46	negative	82.6349	negative	n.t.	n.t.	n.t.
	P 2407	-9.36	negative	90.2505	negative	n.t.	n.t.	n.t.
	P 2408	-14.02	negative	7.75274	positive	10	480	< 10
	P 2411	-6.9	negative	11.1578	positive	15	< 10	< 10
	P 2412	-5.24	negative	102.591	negative	n.t.	n.t.	n.t.
	P 2413	-8.35	negative	90.6562	negative	n.t.	n.t.	n.t.
	P 2414	-7.45	negative	89.0565	negative	n.t.	n.t.	n.t.
	P 2415	-6.85	negative	91.9188	negative	n.t.	n.t.	n.t.
	P 2416	-8.23	negative	8.19836	positive	20	< 10	< 10
	P 2417	-8.809	negative	67.735	negative	n.t.	n.t.	n.t.
	P 2418	-4.374	negative	66.8552	negative	n.t.	n.t.	n.t.
	P 2419	-1.75	negative	6.40443	positive	40	< 10	10
	P 2420	-9.41	negative	7.06144	positive	320	< 10	15
	P 2421	-8.51	negative	92.7547	negative	n.t.	n.t.	n.t.
	P 2422	-9.7	negative	99.6277	negative	n.t.	n.t.	n.t.
	P 2423	-10.38	negative	96.0569	negative	n.t.	n.t.	n.t.
	P 2424	-4.73	negative	84.899	negative	n.t.	n.t.	n.t.
	P 2425	-11.28	negative	88.3355	negative	n.t.	n.t.	n.t.
	P 2426	-7.26	negative	87.4016	negative	n.t.	n.t.	n.t.
	P 2427	1.25	negative	87.0781	negative	n.t.	n.t.	n.t.
	P 2428	-3.83	negative	98.2665	negative	n.t.	n.t.	n.t.
	P 2429	-6.9	negative	92.5105	negative	n.t.	n.t.	n.t.
	P 2430	-6.21	negative	84.3435	negative	n.t.	n.t.	n.t.
	P 2431	-6	negative	90.5939	negative	n.t.	n.t.	n.t.
	P 2432	-3.81	negative	88.2683	negative	n.t.	n.t.	n.t.
	P 2434	0.26	negative	27.8826	positive	< 10	10	< 10
	P 2435	2.16	negative	69.1815	negative	n.t.	n.t.	n.t.
	P 2436	36.1	negative	95.6479	negative	< 10	< 10	< 10
	P 2437	3.99	negative	92.6326	negative	n.t.	n.t.	n.t.
	P 2438	-0.76	negative	97.1678	negative	n.t.	n.t.	n.t.
	P 2439	1.74	negative	94.8422	negative	n.t.	n.t.	n.t.
	P 2440	4.69	negative	87.2307	negative	n.t.	n.t.	n.t.
	P 2441	5.38	negative	71.2751	negative	n.t.	n.t.	n.t.
	P 2442	5.63	negative	88.5735	negative	n.t.	n.t.	n.t.
	P 2444	3.15	negative	96.0996	negative	n.t.	n.t.	n.t.
	P 2445	9.04	negative	98.7609	negative	n.t.	n.t.	n.t.
	P 2446	8.68	negative	97.377	negative	n.t.	n.t.	n.t.
	P 2447	2.42	negative	88.7076	negative	n.t.	n.t.	n.t.
	P 2448	13.66	negative	7.78893	positive	120	< 10	< 10
						n.t. = not tested

## Sheet: Tabelle3
Supplemental Table 3:		Detailed ELISA and different VNT results of each horse sample from panel B (NRW) from 2018
						positive VNT titers highlighted in bold and orange
		IgM-WNV-ELISA		IgG-WNV-ELISA		WNV-VNT	TBEV-VNT	USUV-VNT
	ID number	S/P%	result	S/N %	result	ND50	ND50	ND50
	P 1955	4.26616	negative	88.69	negative	n.t.	n.t.	n.t.
	P 1956	6.24875	negative	85.37	negative	n.t.	n.t.	n.t.
	P 1957	4.6996	negative	91.14	negative	n.t.	n.t.	n.t.
	P 1958	4.59526	negative	75.89	negative	n.t.	n.t.	n.t.
	P 1959	3.59193	negative	83.49	negative	n.t.	n.t.	n.t.
	P 1960	10.8641	negative	80.23	negative	n.t.	n.t.	n.t.
	P 1961	5.95979	negative	84.42	negative	n.t.	n.t.	n.t.
	P 1962	4.22603	negative	77.26	negative	n.t.	n.t.	n.t.
	P 1963	6.66613	negative	80.51	negative	n.t.	n.t.	n.t.
	P 1964	1.94646	negative	79.73	negative	n.t.	n.t.	n.t.
	P 1965	4.82	negative	78.23	negative	n.t.	n.t.	n.t.
	P 1966	8.27146	negative	72.95	negative	n.t.	n.t.	n.t.
	P 1967	11.4259	negative	71.83	negative	n.t.	n.t.	n.t.
	P 1968	1.64145	negative	80.18	negative	n.t.	n.t.	n.t.
	P 1969	11.7309	negative	81.13	negative	n.t.	n.t.	n.t.
	P 1970	1.22406	negative	68.78	negative	n.t.	n.t.	n.t.
	P 1971*	4.82	negative	71	negative	n.t.	n.t.	n.t.
	P 1972	16.9804	negative	76.74	negative	n.t.	n.t.	n.t.
	P 1973	6.3852	negative	76.25	negative	n.t.	n.t.	n.t.
	P 1974	7.01931	negative	74.04	negative	n.t.	n.t.	n.t.
	P 1975	11.2574	negative	73.39	negative	n.t.	n.t.	n.t.
	P 1976	7.52498	negative	71.53	negative	n.t.	n.t.	n.t.
	P 1977	5.93571	negative	77.27	negative	n.t.	n.t.	n.t.
	P 1978	15.3189	negative	74.48	negative	n.t.	n.t.	n.t.
	P 1979	10.8801	negative	70.83	negative	n.t.	n.t.	n.t.
	P 1980	6.56178	negative	70.72	negative	n.t.	n.t.	n.t.
	P 1981	10.7196	negative	31.46	positive	< 10	60	< 10
	P 1982	1.43276	negative	75.37	negative	n.t.	n.t.	n.t.
	P 1983	11.3617	negative	68.6	negative	n.t.	n.t.	n.t.
	P 1984	18.9549	negative	69.76	negative	n.t.	n.t.	n.t.
	P 1985	8.37581	negative	92.669	negative	n.t.	n.t.	n.t.
	P 1986	5.99189	negative	84.3722	negative	n.t.	n.t.	n.t.
	P 1987	9.38717	negative	85.7972	negative	n.t.	n.t.	n.t.
	P 1988	8.66477	negative	90.4101	negative	n.t.	n.t.	n.t.
	P 1989	9.39519	negative	98.6964	negative	n.t.	n.t.	n.t.
	P 1990	9.12228	negative	84.1505	negative	n.t.	n.t.	n.t.
	P 1991	7.43669	negative	84.6044	negative	n.t.	n.t.	n.t.
	P 1992	6.7785	negative	95.6563	negative	n.t.	n.t.	n.t.
	P 1993	8.80122	negative	94.4424	negative	n.t.	n.t.	n.t.
	P 1994	5.55043	negative	99.4036	negative	n.t.	n.t.	n.t.
	P 1995	13.3122	negative	100.174	negative	n.t.	n.t.	n.t.
	P 1996	7.05141	negative	99.6675	negative	n.t.	n.t.	n.t.
	P 1997	12.6941	negative	91.1068	negative	n.t.	n.t.	n.t.
	P 1998	7.17984	negative	93.2918	negative	n.t.	n.t.	n.t.
	P 1999	24.5691	negative	95.9202	negative	n.t.	n.t.	n.t.
	P 2000	0.419638	negative	90.7584	negative	n.t.	n.t.	n.t.
	P 2001	-0.816714	negative	91.9935	negative	n.t.	n.t.	n.t.
	P 2002	3.58722	negative	94.6218	negative	n.t.	n.t.	n.t.
	P 2003	19.4161	negative	94.5585	negative	n.t.	n.t.	n.t.
	P 2004	4.63406	negative	22.5682	positive	< 10	20	< 10
	P 2005	10.5	negative	102	negative	n.t.	n.t.	n.t.
	P 2006	12.2958	negative	95.1813	negative	n.t.	n.t.	n.t.
	P 2007	25.3091	negative	101.388	negative	n.t.	n.t.	n.t.
	P 2008	8.1175	negative	99.4142	negative	n.t.	n.t.	n.t.
	P 2009	1.87257	negative	104.059	negative	n.t.	n.t.	n.t.
	P 2010	12.8012	negative	101.631	negative	n.t.	n.t.	n.t.
	P 2011	8.99287	negative	103.088	negative	n.t.	n.t.	n.t.
	P 2012	8.80336	negative	79.3371	negative	n.t.	n.t.	n.t.
	P 2013	3.67747	negative	96.5324	negative	n.t.	n.t.	n.t.
	P 2014	11.6822	negative	88.8795	negative	n.t.	n.t.	n.t.
	P 2015	3.73161	negative	91.0645	negative	n.t.	n.t.	n.t.
	P 2016	7.45871	negative	96.6591	negative	n.t.	n.t.	n.t.
	P 2017	1.09647	negative	103.425	negative	n.t.	n.t.	n.t.
	P 2018	6.19529	negative	83.9288	negative	n.t.	n.t.	n.t.
	P 2019	16.059	negative	93.999	negative	n.t.	n.t.	n.t.
	P 2020	5.39211	negative	98.7386	negative	n.t.	n.t.	n.t.
	P 2021	11.1136	negative	69.48	negative	n.t.	n.t.	n.t.
	* donkey					n.t. = not tested

## Sheet: Tabelle4
Supplemental Table 4:		Detailed ELISA and different VNT results of each horse sample from panel B (NRW) from 2020
						positive VNT titers highlighted in bold and orange
		IgM-WNV-ELISA		IgG-WNV-ELISA		WNV-VNT	TBEV-VNT	USUV-VNT
	ID number	S/P%	result	S/N %	result	ND50	ND50	ND50
	P 2293	-5.4	negative	94.8537	negative	n.t.	n.t.	n.t.
	P 2294	-6.47	negative	93.7413	negative	n.t.	n.t.	n.t.
	P 2295	-4.35	negative	95.7582	negative	n.t.	n.t.	n.t.
	P 2296	-7.09	negative	101.659	negative	n.t.	n.t.	n.t.
	P 2297	-7.15	negative	112.17	negative	n.t.	n.t.	n.t.
	P 2298	-9.52	negative	103.468	negative	n.t.	n.t.	n.t.
	P 2299	-7.65	negative	86.2017	negative	n.t.	n.t.	n.t.
	P 2300	-7.083	negative	96.9809	negative	n.t.	n.t.	n.t.
	P 2302	-6.77	negative	96.2073	negative	n.t.	n.t.	n.t.
	P 2303	-60.1	negative	85.4469	negative	n.t.	n.t.	n.t.
	P 2304	-8.46	negative	88.4909	negative	n.t.	n.t.	n.t.
	P 2305	-8.05	negative	107.018	negative	n.t.	n.t.	n.t.
	P 2306	-9.36	negative	109.182	negative	n.t.	n.t.	n.t.
	P 2307	-12.89	negative	105.39	negative	n.t.	n.t.	n.t.
	P 2308	-7.74	negative	115.501	negative	n.t.	n.t.	n.t.
	P 2309	-9.87	negative	104.279	negative	n.t.	n.t.	n.t.
	P 2310	-9.02	negative	104.304	negative	n.t.	n.t.	n.t.
	P 2311	-0.99	negative	90.325	negative	n.t.	n.t.	n.t.
	P 2312	-5.024	negative	110.636	negative	n.t.	n.t.	n.t.
	P 2313	-2.701	negative	105.608	negative	n.t.	n.t.	n.t.
	P 2314	-5.14	negative	115.277	negative	n.t.	n.t.	n.t.
	P 2315	-5.739	negative	108.646	negative	n.t.	n.t.	n.t.
	P 2316	-4.103	negative	105.09	negative	n.t.	n.t.	n.t.
	P 2317	-1.913	negative	96.1263	negative	n.t.	n.t.	n.t.
	P 2318	-7.229	negative	92.4147	negative	n.t.	n.t.	n.t.
	P 2319	-1.051	negative	92.6767	negative	n.t.	n.t.	n.t.
	P 2320	-11.71	negative	97.4924	negative	n.t.	n.t.	n.t.
	P 2321	-5.54	negative	99.0773	negative	n.t.	n.t.	n.t.
	P 2322	-15.729	negative	95.5898	negative	n.t.	n.t.	n.t.
	P 2323	-13.74	negative	104.229	negative	n.t.	n.t.	n.t.
	P 2324	-6.69	negative	98.7631	negative	n.t.	n.t.	n.t.
	P 2325	-6.557	negative	116.056	negative	n.t.	n.t.	n.t.
	P 2326	-3.79	negative	98.03	negative	n.t.	n.t.	n.t.
	P 2327	-4.644	negative	111.347	negative	n.t.	n.t.	n.t.
	P 2328	-9.865	negative	97.2	negative	n.t.	n.t.	n.t.
	P 2329	-10.793	negative	9.3	positive	< 10	80	< 10
	P 2330	-11.21	negative	90.0755	negative	n.t.	n.t.	n.t.
	P 2331	-12.6	negative	92.5831	negative	n.t.	n.t.	n.t.
	P 2332	-12.706	negative	89.2396	negative	n.t.	n.t.	n.t.
	P 2333	-7.81	negative	103.63	negative	n.t.	n.t.	n.t.
	P 2334	-6.71	negative	100.823	negative	n.t.	n.t.	n.t.
	P 2335	-15.37	negative	111.521	negative	n.t.	n.t.	n.t.
	P 2337	-9.96	negative	100.381	negative	n.t.	n.t.	n.t.
	P 2338	-8.93	negative	92.65	negative	n.t.	n.t.	n.t.
	P 2339	-10.953	negative	97.5922	negative	n.t.	n.t.	n.t.
	P 2340	-12.57	negative	98.2534	negative	n.t.	n.t.	n.t.
	P 2341	-11.21	negative	109.425	negative	n.t.	n.t.	n.t.
	P 2342	-8.967	negative	112.919	negative	n.t.	n.t.	n.t.
	P 2343	-10.9	negative	113.81	negative	n.t.	n.t.	n.t.
	P 2344	-10.169	negative	96.27	negative	n.t.	n.t.	n.t.
	P 2345	-9.515	negative	93.88	negative	n.t.	n.t.	n.t.
	P 2346	-13.808	negative	87.94	negative	n.t.	n.t.	n.t.
	P 2347	-0.663	negative	113.249	negative	n.t.	n.t.	n.t.
	P 2348	-7.535	negative	8.75	positive	80	< 10	< 10
	P 2349	-3.08	negative	10.84	positive	80	< 10	< 10
	P 2350	-10.98	negative	113.056	negative	n.t.	n.t.	n.t.
	P 2351	-10.172	negative	110.985	negative	n.t.	n.t.	n.t.
	P 2354	-6.181	negative	88.51	negative	n.t.	n.t.	n.t.
	P 2355	-13.124	negative	94.2486	negative	n.t.	n.t.	n.t.
	P 2356	-9.34	negative	93.2818	negative	n.t.	n.t.	n.t.
	P 2357	-9.578	negative	92.0092	negative	n.t.	n.t.	n.t.
	P 2358	-3.745	negative	53.62	negative	n.t.	n.t.	n.t.
	P 2359	-11.93	negative	110.442	negative	n.t.	n.t.	n.t.
	P 2360	-12.509	negative	88.09	negative	n.t.	n.t.	n.t.
	P 2361	-13.32	negative	87.5	negative	n.t.	n.t.	n.t.
	P 2362	-13.91	negative	86.66	negative	n.t.	n.t.	n.t.
	P 2363	-14.86	negative	85.03	negative	n.t.	n.t.	n.t.
	P 2364	-14.82	negative	96.63	negative	n.t.	n.t.	n.t.
	P 2365	-14.688	negative	103.545	negative	n.t.	n.t.	n.t.
	P 2366	-7.22	negative	82.3264	negative	n.t.	n.t.	n.t.
	P 2367	-15.283	negative	48.85	doubtful	< 10	15	< 10
	P 2368	-16.273	negative	91.4617	negative	n.t.	n.t.	n.t.
	P 2369	-14.193	negative	81.3894	negative	n.t.	n.t.	n.t.
	P 2370	-4.97	negative	96.1236	negative	n.t.	n.t.	n.t.
	P 2371	-3.83	negative	94.781	negative	n.t.	n.t.	n.t.
	P 2372	-8.845	negative	94.4211	negative	n.t.	n.t.	n.t.
						n.t. = not tested

## Sheet: Tabelle5
Supplemental Table 5:			Detailed ELISA and different VNT results of 36 vaccinated horse sample from panel A (BB/BE) from 2020
							positive VNT titers highlighted in bold and orange
		WNV	IgM-WNV-ELISA		IgG-WNV-ELISA		WNV-VNT	TBEV-VNT	USUV-VNT
	ID number	vaccination	S/P%	result	S/N %	result	ND50	ND50	ND50
	P 2152	yes	-10.98	negative	35.3901	positive	< 10	< 10	< 10
	P 2156	yes	-10.54	negative	15.3553	positive	< 10	< 10	< 10
	P 2160	yes	-12.57	negative	14.643	positive	40	< 10	10
	P 2163	yes	-7.41	negative	7.90956	positive	100	< 10	25
	P 2165	yes	-6.34	negative	11.8685	positive	< 10	< 10	15
	P 2184	yes	-13.2023	negative	9.1364	positive	10	< 10	< 10
	P 2185	yes	-11.688	negative	18.9949	positive	< 10	< 10	< 10
	P 2187	yes	-19.46	negative	8.42865	positive	80	< 10	10
	P 2189	yes	-14.72	negative	32.2491	positive	< 10	< 10	< 10
	P 2199	yes	-6.46	negative	9.08636	positive	80	< 10	< 10
	P 2207	yes	15.44	negative	9.95854	positive	10	< 10	< 10
	P 2215	yes	-4.58	negative	10.6541	positive	240	< 10	30
	P 2219	yes	-11.86	negative	18.7851	positive	< 10	< 10	< 10
	P 2220	yes	-9.2	negative	17.2056	positive	60	< 10	< 10
	P 2224	yes	-6.707	negative	12.7425	positive	40	< 10	< 10
	P 2225	yes	9.42	negative	23.3436	positive	20	< 10	30
	P 2226	yes	-6.067	negative	72.6916	negative	n.t.	n.t.	n.t.
	P 2228	yes	-8.56	negative	38.99	positive	< 10	< 10	< 10
	P 2233	yes	-10.85	negative	20.3223	positive	640	< 10	80
	P 2238	yes	-11.583	negative	21.764	positive	< 10	< 10	< 10
	P 2242	yes	-7.038	negative	35.795	positive	< 10	< 10	< 10
	P 2243	yes	-0.728	negative	14.0888	positive	15	< 10	< 10
	P 2248	yes	-4.02	negative	12.8485	positive	60	< 10	< 10
	P 2249	yes	-3.12	negative	11.8202	positive	960	< 10	< 10
	P 2275	yes	-4.732	negative	19.0007	positive	40	< 10	< 10
	P 2283	yes	-1.7	negative	46.52	doubtful	< 10	< 10	< 10
	P 2287	yes	-5.331	negative	23.0041	positive	60	< 10	< 10
	P 2378	yes	-6.31	negative	6.45014	positive	80	< 10	< 10
	P 2393	yes	-7.21	negative	67.88	negative	n.t.	n.t.	n.t.
	P 2395	yes	-9.75	negative	6.49584	positive	640	< 10	60
	P 2402	yes	-5.48	negative	52.34	negative	< 10	< 10	< 10
	P 2409	yes	-13.27	negative	7.29568	positive	80	< 10	15
	P 2410	yes	-8.58	negative	17.5165	positive	< 10	< 10	< 10
	P 2443	yes	8.48	negative	7.51389	positive	60	< 10	< 10
	P 2449	yes	7.42	negative	21.6428	positive	30	< 10	< 10
	P 2450	yes	13.75	negative	78.6282	negative	n.t.	n.t.	n.t.
							n.t. = not tested

## Sheet: Tabelle6
Supplemental Table 6:			Detailed ELISA and different VNT results of four vaccinated horse sample from panel B (NRW) from 2020
							positive VNT titers highlighted in bold and orange
		WNV	IgM-WNV-ELISA		IgG-WNV-ELISA		WNV-VNT	TBEV-VNT	USUV-VNT
	ID number	vaccination	S/P%	result	S/N %	result	ND50	ND50	ND50
	P 2301	yes	-8.93	negative	22.44	positive	< 10	< 10	< 10
	P 2336	yes	-8.061	negative	86.4076	negative	n.t.	n.t.	n.t.
	P 2352	yes	-13.67	negative	73.5076	negative	n.t.	n.t.	n.t.
	P 2353	yes	-7.14	negative	11.2906	positive	< 10	< 10	< 10
							n.t. = not tested
